# Supplementary material for: First-principles-based microkinetic modeling of methanol steam reforming over Cu(111) and Cu(211): structure sensitive activity and selectivity
Source: Royal Society of Chemistry journal article supplement (doi:10.1039/d4dt01808g), 2024-01-01
Supplement: d4dt01808g1.pdf [file d4dt01808g1.pdf]

## Electronic Supplementary Information

### **First-principles-based Microkinetic Modeling of Methanol Steam Reforming over Cu(111) and Cu(211): Structure Sensitive Activity and Selectivity**

Xinyi Zhang and Bo Yang\*

*School of Physical Science and Technology, ShanghaiTech University, 393 Middle  
Huaxia Road, Shanghai 201210, China*

\*E-mail: [yangbo1@shanghaitech.edu.cn](mailto:yangbo1@shanghaitech.edu.cn)

**Table S1.** Activation energies ( $E_a$ ) and reaction energies ( $\Delta E$ ), in eV, for the all elementary steps in the full reaction network of methanol steam reforming to CO and CO<sub>2</sub> on Cu(211) and Cu(111).

| Elementary steps                                                               | Cu(111) |            | Cu(211) |            |
|--------------------------------------------------------------------------------|---------|------------|---------|------------|
|                                                                                | $E_a$   | $\Delta E$ | $E_a$   | $\Delta E$ |
| $2^* + \text{CH}_3\text{OH}_g \rightarrow \text{CH}_3\text{O}^* + \text{H}^*$  | 1.03    | -0.31      | 1.03    | -0.36      |
| $\text{CH}_3^* + \text{OH}^* \rightarrow \text{CH}_3\text{OH}^* + ^*$          | 1.89    | -0.06      | 2.13    | 0.22       |
| $\text{CH}_3\text{OH}^* + ^* \rightarrow \text{CH}_2\text{OH}^* + \text{H}^*$  | 1.67    | 1.06       | 1.71    | 0.90       |
| $\text{H}_2\text{O}_g + 2^* \rightarrow \text{OH}^* + \text{H}^*$              | 1.20    | -0.17      | 1.14    | -0.35      |
| $\text{OH}^* + ^* \rightarrow \text{O}^* + \text{H}^*$                         | 1.82    | 0.63       | 1.76    | 0.94       |
| $\text{CH}_3\text{O}^* + ^* \rightarrow \text{H}^* + \text{CH}_2\text{O}^*$    | 1.42    | 0.99       | 1.28    | 1.10       |
| $\text{CH}_3\text{O}^* + ^* \rightarrow \text{CH}_3^* + \text{O}^*$            | 1.92    | 0.71       | 1.97    | 0.74       |
| $\text{CH}_3^* + ^* \rightarrow \text{CH}_2^* + \text{H}^*$                    | 1.60    | 0.88       | 1.38    | 1.05       |
| $\text{CH}_2^* + ^* \rightarrow \text{CH}^* + \text{H}^*$                      | 1.11    | 0.45       | 0.84    | 0.24       |
| $\text{CH}^* + ^* \rightarrow \text{C}^* + \text{H}^*$                         | 2.02    | 1.27       | 1.57    | 0.88       |
| $\text{CH}_2^* + \text{OH}^* \rightarrow \text{CH}_2\text{OH}^* + ^*$          | 1.24    | 0.12       | 0.97    | 0.08       |
| $\text{CH}_2\text{OH}^* + ^* \rightarrow \text{CH}_2\text{O}^* + \text{H}^*$   | 1.09    | -0.09      | 1.29    | 0.18       |
| $\text{CH}_2\text{OH}^* + ^* \rightarrow \text{CHOH}^* + \text{H}^*$           | 1.03    | 0.54       | 0.99    | 0.64       |
| $\text{CHOH}^* + ^* \rightarrow \text{HCO}^* + \text{H}^*$                     | 0.75    | -0.26      | 1.06    | -0.18      |
| $\text{HCO}^* + ^* \rightarrow \text{CO}^* + \text{H}^*$                       | 0.31    | -0.75      | 0.38    | -0.42      |
| $\text{CHOH}^* + ^* \rightarrow \text{COH}^* + \text{H}^*$                     | 0.92    | 0.21       | 1.24    | 0.60       |
| $\text{COH}^* + ^* \rightarrow \text{CO}^* + \text{H}^*$                       | 1.23    | -1.21      | 0.70    | -1.20      |
| $\text{CH}_2\text{O}^* + ^* \rightarrow \text{CH}_2^* + \text{O}^*$            | 1.52    | 0.60       | 1.48    | 0.68       |
| $\text{CH}_2\text{O}^* + ^* \rightarrow \text{HCO}^* + \text{H}^*$             | 0.96    | 0.38       | 1.00    | 0.28       |
| $\text{CH}_2\text{O}^* + \text{OH}^* \rightarrow \text{H}_2\text{COOH}^* + ^*$ | 0.16    | -0.42      | 0.04    | -0.40      |
| $\text{H}_2\text{COOH}^* + ^* \rightarrow \text{HCOOH}^* + \text{H}^*$         | 1.08    | -0.02      | 1.07    | 0.29       |
| $\text{H}_2\text{COOH}^* + ^* \rightarrow \text{H}_2\text{COO}^* + \text{H}^*$ | 1.45    | 0.39       | 1.53    | 0.35       |
| $\text{HCOOH}^* + ^* \rightarrow \text{HCOO}^* + \text{H}^*$                   | 0.71    | -0.39      | 0.69    | -0.66      |
| $\text{HCOO}^* + ^* \rightarrow \text{CO}_2_g + \text{H}^* + ^*$               | 1.19    | 0.70       | 1.52    | 1.14       |
| $\text{CO}^* + \text{O}^* \rightarrow \text{CO}_2_g + 2^*$                     | 0.73    | -0.38      | 0.30    | -0.45      |
| $\text{HCO}^* + \text{O}^* \rightarrow \text{HCOO}^* + ^*$                     | 0.34    | -1.83      | 0.58    | -2.01      |
| $\text{H}_2\text{COO}^* + ^* \rightarrow \text{HCOO}^* + \text{H}^*$           | 0.89    | -0.79      | 0.96    | -0.73      |
| $\text{COOH}^* + \text{H}^* \rightarrow \text{HCOOH}^* + ^*$                   | 0.91    | -0.48      | 0.85    | -0.37      |

|                                                                                            |      |       |      |       |
|--------------------------------------------------------------------------------------------|------|-------|------|-------|
| $\text{COOH}^* + * \rightarrow \text{CO}_2\text{_g} + \text{H}^* + *$                      | 1.39 | -0.17 | 1.81 | 0.11  |
| $\text{CO}^* + \text{OH}^* \rightarrow \text{COOH}^* + *$                                  | 0.72 | 0.42  | 0.90 | 0.39  |
| $\text{COH}^* + \text{O}^* \rightarrow \text{COOH}^* + *$                                  | 0.81 | -1.42 | 1.39 | -1.76 |
| $\text{HCO}^* + \text{OH}^* \rightarrow \text{HCOOH}^* + *$                                | 0.69 | -0.82 | 1.76 | -0.40 |
| $\text{CH}_2\text{O}^* + \text{O}^* \rightarrow \text{H}_2\text{COO}^* + *$                | 0.02 | -0.66 | 0.04 | -0.99 |
| $\text{CH}^* + \text{OH}^* \rightarrow \text{CHOH}^* + *$                                  | 1.31 | 0.21  | 1.76 | 0.48  |
| $\text{CH}^* + \text{O}^* \rightarrow \text{HCO}^* + *$                                    | 1.08 | -0.67 | 1.32 | -0.64 |
| $\text{C}^* + \text{OH}^* \rightarrow \text{COH}^* + *$                                    | 1.23 | -0.85 | 2.34 | 0.20  |
| $\text{C}^* + \text{O}^* \rightarrow \text{CO}^* + *$                                      | 1.17 | -2.69 | 1.46 | -1.94 |
| $\text{H}_2\text{COOH}^* + * \rightarrow \text{CH}_2\text{OH}^* + \text{O}^*$              | 1.74 | 1.14  | 2.18 | 1.16  |
| $\text{CHOH}^* + \text{O}^* \rightarrow \text{HCOOH}^* + *$                                | 0.34 | -1.70 | 0.55 | -1.52 |
| $\text{CH}_2\text{O}^* + \text{CH}_3\text{O}^* \rightarrow \text{CH}_2\text{OOCH}_3^* + *$ | 0.24 | -0.43 | 0.10 | -0.57 |
| $\text{CH}_2\text{OOCH}_3^* + * \rightarrow \text{H}_2\text{COO}^* + \text{CH}_3^*$        | 2.03 | 0.48  | 2.25 | 0.32  |
| $\text{CH}_2\text{OOCH}_3^* + * \rightarrow \text{HCOOCH}_3^* + \text{H}^*$                | 1.01 | 0.02  | 1.17 | 0.32  |
| $\text{HCOOCH}_3^* + * \rightarrow \text{HCOOCH}_2^* + \text{H}^*$                         | 1.75 | 0.91  | 1.72 | 0.67  |
| $\text{HCOOCH}_3^* + \text{OH}^* \rightarrow \text{HOOHCOCH}_3^* + *$                      | 0.56 | 0.27  | 0.70 | 0.23  |
| $\text{HOOHCOCH}_3^* + * \rightarrow \text{HCOOOCH}_3^* + \text{H}^*$                      | 1.40 | 0.42  | 1.70 | 0.48  |
| $\text{HCOOOCH}_3^* + * \rightarrow \text{HCOO}^* + \text{CH}_3\text{O}^*$                 | 0.19 | -1.10 | 0.27 | -1.25 |
| $\text{HCOOCH}_3^* + * \rightarrow \text{HCO}^* + \text{CH}_3\text{O}^*$                   | 1.38 | 0.79  | 1.48 | 0.53  |
| $\text{HCOOCH}_2^* + * \rightarrow \text{HCOO}^* + \text{CH}_2^*$                          | 0.76 | -0.36 | 0.99 | -0.37 |
| $\text{HCOOCH}_3^* + * \rightarrow \text{HCOO}^* + \text{CH}_3^*$                          | 1.50 | -0.33 | 1.33 | -0.74 |
| $\text{HCOOOCH}_3^* + * \rightarrow \text{HCOOCH}_3^* + \text{O}^*$                        | 0.35 | -0.06 | 0.38 | 0.23  |
| $\text{HOOHCOCH}_3^* + * \rightarrow \text{HCOOH}^* + \text{CH}_3\text{O}^*$               | 0.37 | -0.29 | 0.38 | -0.10 |
| $\text{H}^* + \text{H}^* \rightarrow \text{H}_2\text{_g} + 2^*$                            | 0.96 | 0.27  | 0.95 | 0.15  |
| $\text{CO}^* \rightarrow \text{CO}_\text{g} + *$                                           | -    | 0.55  | -    | 0.50  |

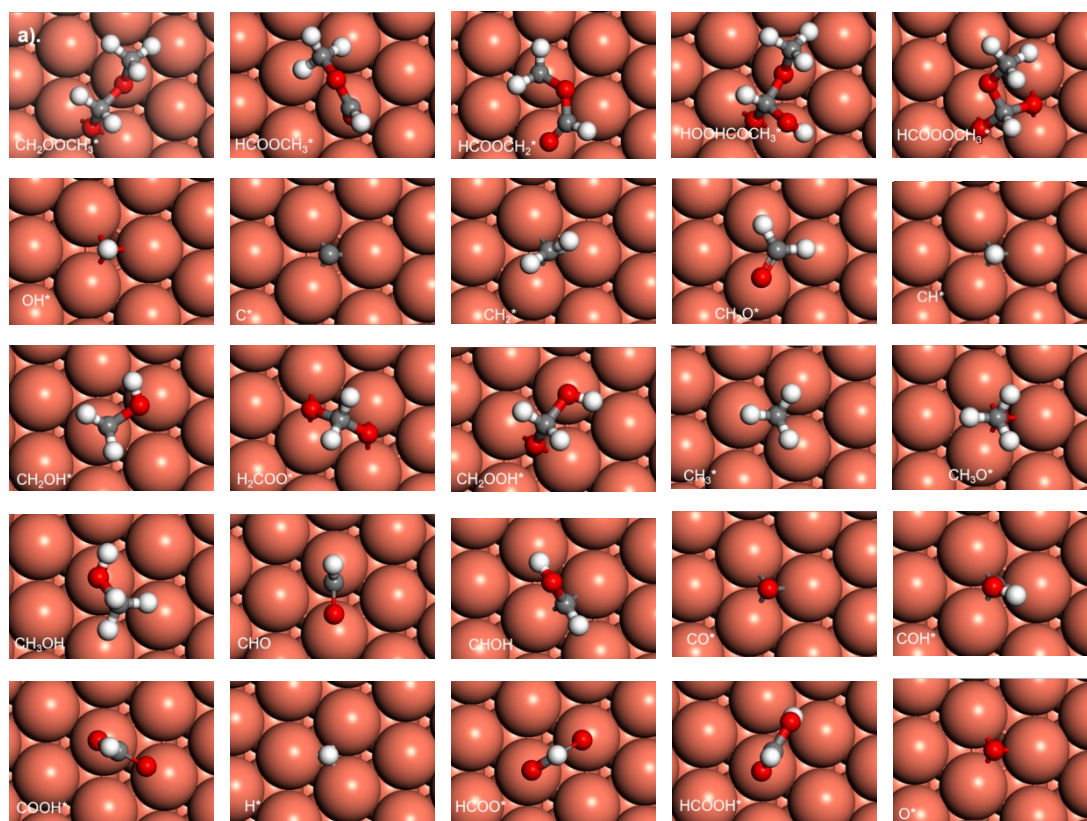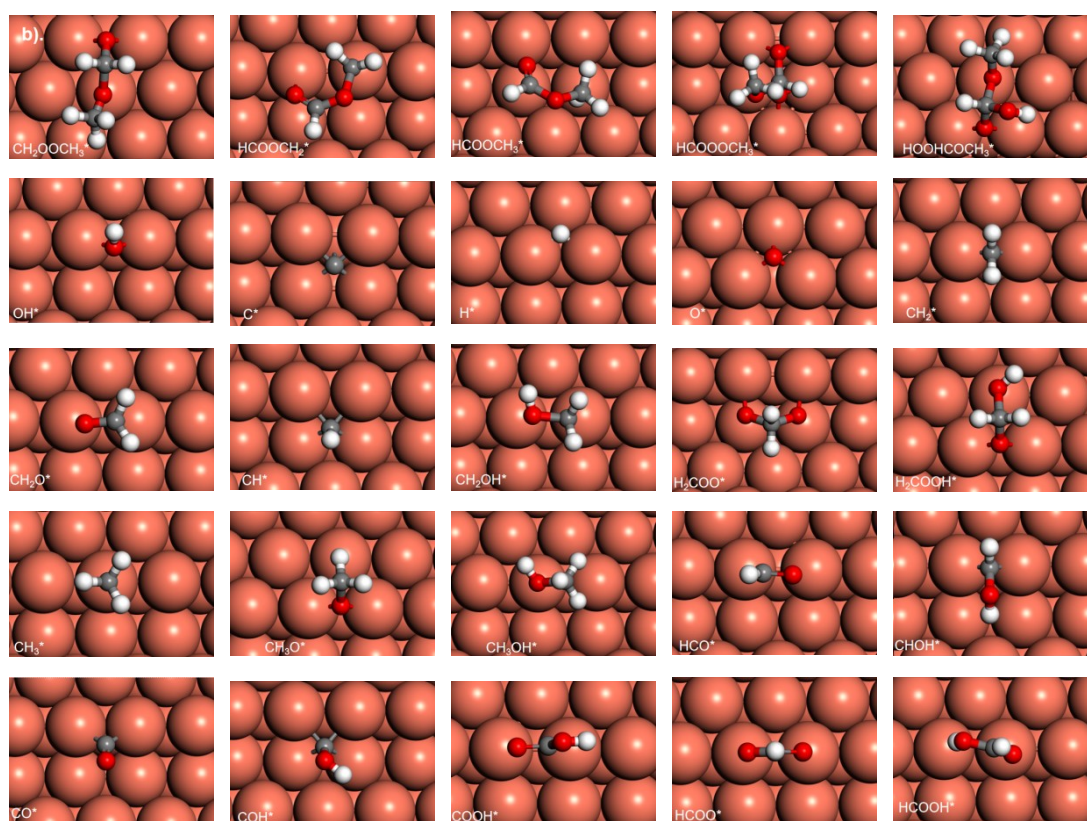





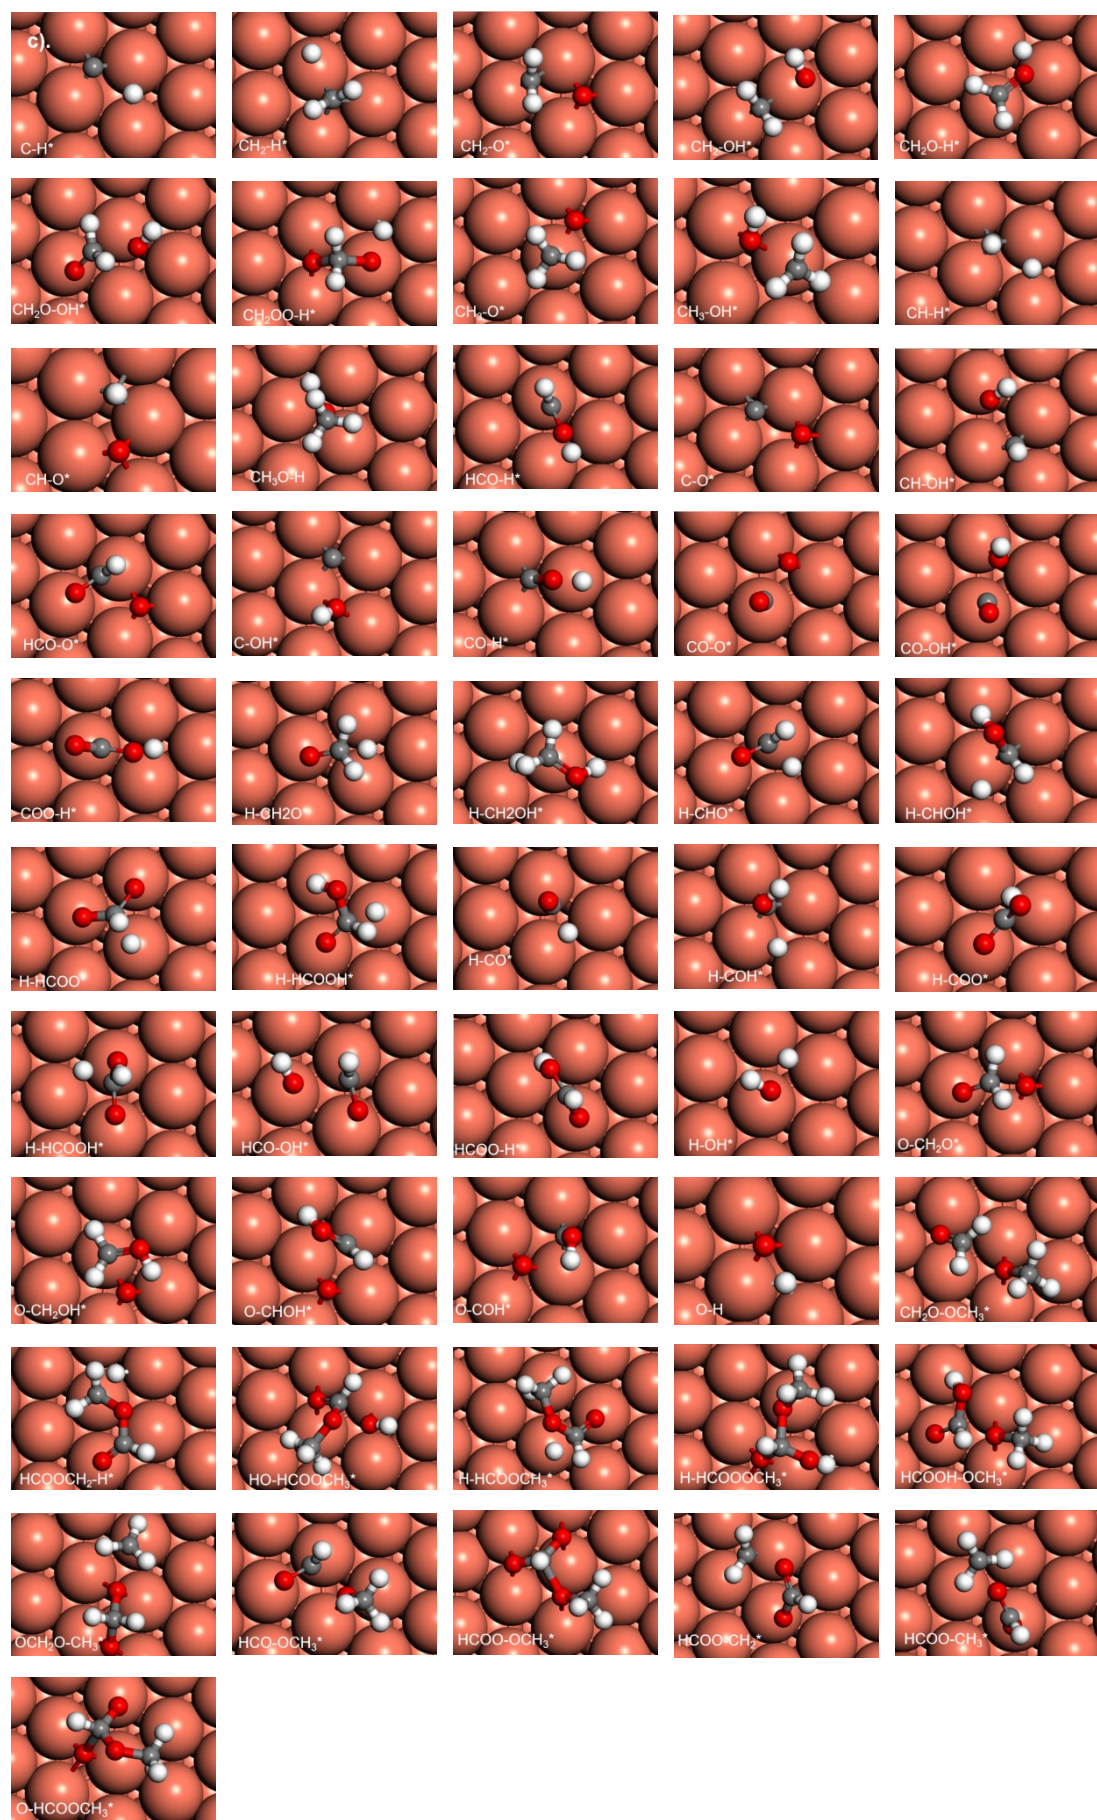





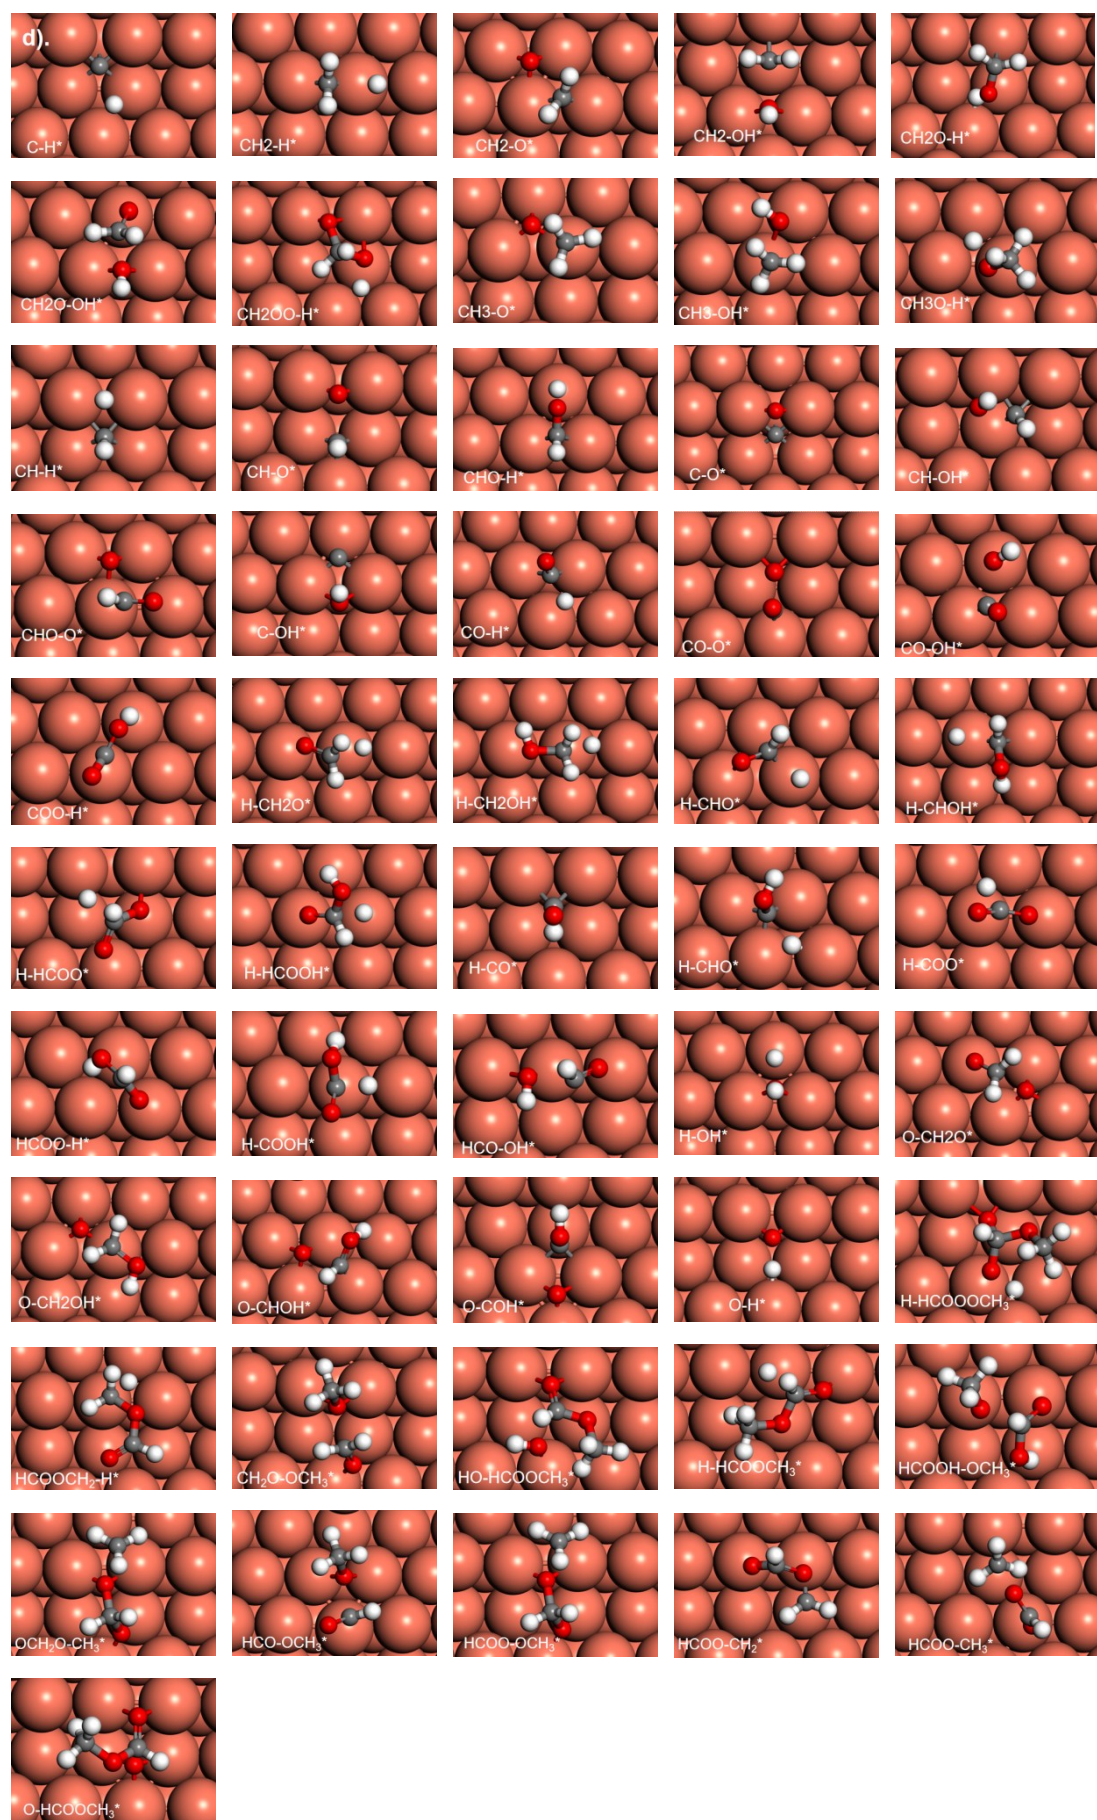



**Figure S1.** The optimized structures of (a) surface intermediates over Cu(111), (b) surface intermediates over Cu(211), (c) transition states over Cu(111), and (d) transition states over Cu(211).

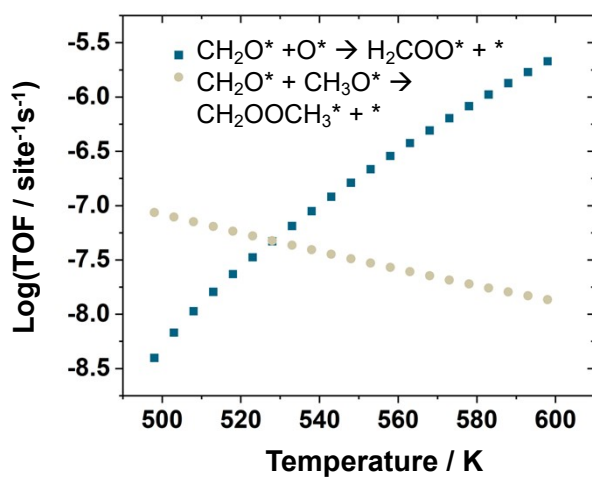

**Figure S2.** The variation of reaction rates of two elementary steps under S:M = 0.1.

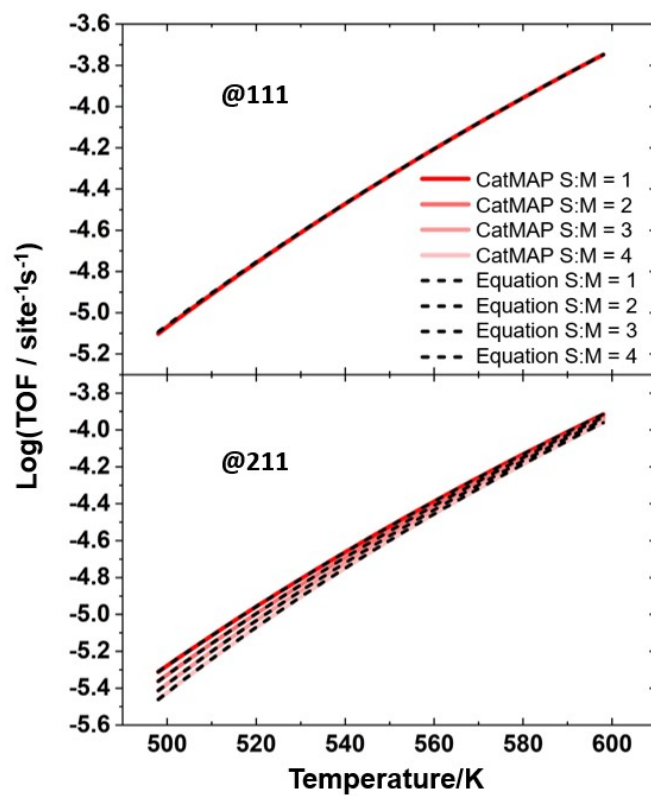

**Figure S3.** Reaction rates calculated by rate equations compared to those calculated with CatMAP.

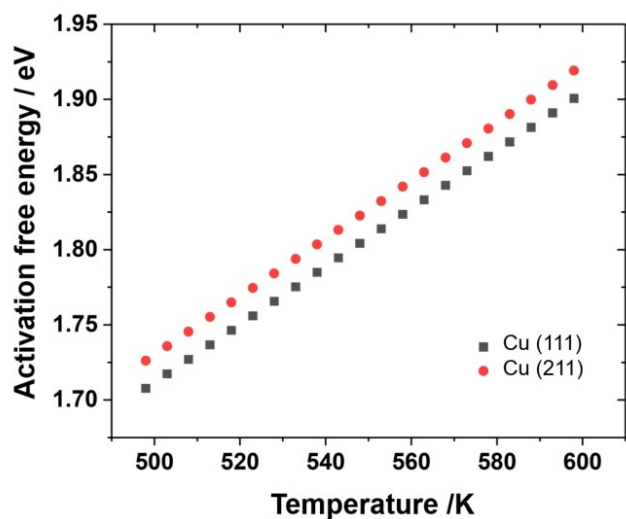

**Figure S4.** Activation free energies of methanol dehydrogenation to methoxy over Cu(211) and Cu(111) as a function of temperature.

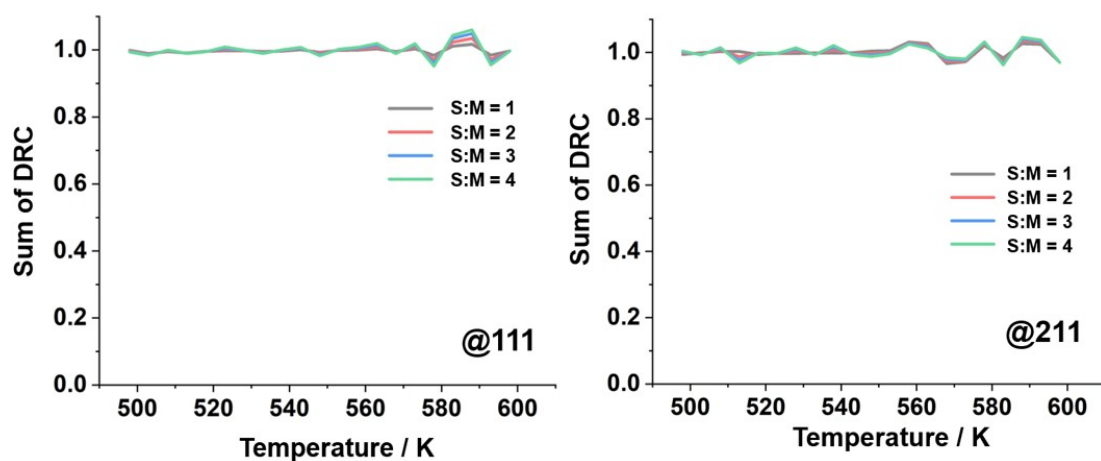

**Figure S5.** Sum of DRC values of all transition states at different temperatures over Cu(211) and Cu(111).

According to the established definitions, the reaction order can be expressed

mathematically as  $\sum_i (\partial(\ln r)/\partial(\ln p_i))$ , while the apparent activation energy is

represented as  $\partial(\ln r)/\partial(-1/(k_B T))$ . Furthermore, we have identified that the dissociative adsorption of methanol constitutes the rate-controlling step. Consequently,

the rate can be described by the equation  $Ae^{-G_a/k_B T} p_{CH_3OH} \theta_*^2$ . It is noteworthy that

the disparity in reaction orders observed over the Cu(111) and Cu(211) surfaces primarily arises from the term  $\theta_*^2$  at the same  $CH_3OH$  partial pressures. In contrast, the

difference between the apparent activation energies is determined by both  $G_a$  and  $\theta_*^2$ .

According to Section 3.3, the predominant surface species across the entire temperature range is hydroxyl. Therefore, we can theoretically derive the relationship between the coverage of free sites and steam partial pressure ( $p_{steam}$ ) by assuming that hydroxyl (OH) and hydrogen (H) are the only adsorbates present on the surface. The relevant reactions can be represented as follows:

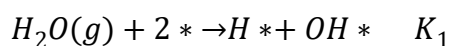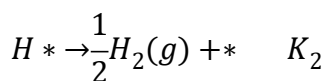

Given that the dissociative adsorption of methanol is the rate-controlling step, the remaining elementary steps can be treated as quasi-equilibrium processes. Thus, we can express the coverage  $\theta_*$  as follows:

$$\theta_* = \frac{\sqrt{p_{H_2}/K_2}}{\sqrt{p_{H_2}/K_2 + K_1 p_{steam}}}$$

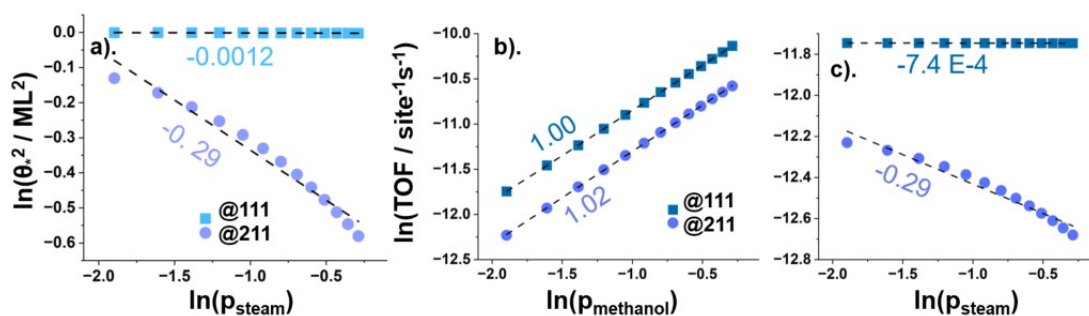

**Figure S6.** (a) The values of  $\ln \theta_*^2$  against  $\ln(p_{steam})$  at  $T = 498$  K and  $p = 1$  bar. (b~c)



The reaction orders calculated from CatMAP data against  $\ln(p_{\text{methanol}})$  and  $\ln(p_{\text{steam}})$ , respectively.

We first plotted the values of  $\ln \theta_*^2$  against  $\ln(p_{\text{steam}})$  at  $T = 498$  K and  $p = 1$  bar in Figure S6 (a). The results of the linear fitting indicate that the slopes are approximately -0.001 for Cu(111) and -0.3 for Cu(211). The reaction orders calculated from CatMAP data are presented in Figure S6 (b,c), where  $\ln TOF$  is plotted against  $\ln p_i$  under the same conditions. It is evident that the reaction order closely aligns with the results derived from the slope of the  $\ln \theta_*^2 - \ln(p_{\text{steam}})$  plot. This analysis leads to the conclusion that the reaction order over Cu(111) is 1, whereas for Cu(211), it is 0.73.

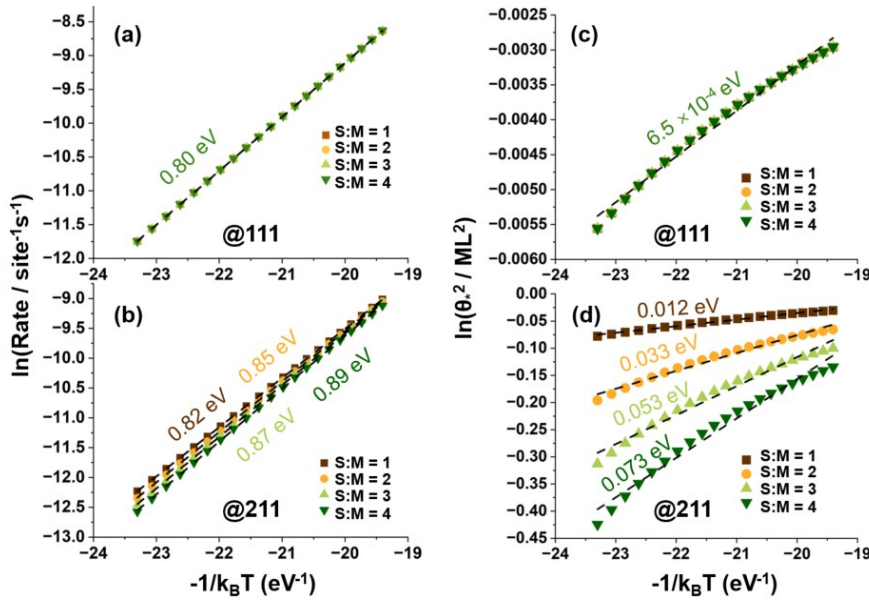

**Figure S7.** (a~b) Plot of  $\ln r$  against  $-1/(k_B T)$ . (c~d)  $\ln \theta_*^2$  plotted against  $-1/(k_B T)$ .

We then plotted  $\ln r$  against  $-1/(k_B T)$  in Figure S7 (a) and (b). It is observed that over Cu(111), the apparent activation energy remains constant across varying S:M ratios, while for Cu(211), the apparent activation energy decreases as the S:M ratio increases. The results of  $\ln \theta_*^2$  plotted against  $-1/(k_B T)$  are presented in Figure S7 (c) and (d). In Figure S7 (c), the value of  $\partial(\ln \theta_*^2)/\partial(-1/(k_B T))$  is 0.00065 eV, whereas in Figure S7 (d), this value is significantly larger and increases with the S:M ratio. This indicates

that the coverage of free sites over the Cu(211) facet exhibits greater variability compared to the Cu(111) facet. The activation energies of the rate-controlling step calculated via DFT are both 1.03 eV for the Cu(111) and Cu(211) facets, suggesting that the contribution of  $G_a$  on the apparent activation energies is nearly identical across these two surfaces. We can conclude that the observed difference in the value of  $\partial(\ln \theta_*^2)/\partial(-1/(k_B T))$  accounts for the differing apparent activation energies between Cu(111) and Cu(211), as well as the variation observed over Cu(211) under different S:M ratios.
